# Supplementary material for: Alleviation of Endoplasmic Reticulum Stress Enhances Human Corneal Epithelial Cell Viability under Hyperosmotic Conditions
Source: MDPI journal article supplement (doi:10.3390/ijms23094528), 2022-04-20
Supplement: s1 [file s1]

**Supplementary Table S1.** Relative expression of genes responsible for inflammation and autoimmunity in stratified human corneal epithelial cells. Cell cultures were exposed to HOS (94 mM NaCl, 24 h). Values in bold indicate statistically significant changes in gene expression following addition of 1 mM TUDCA. High positive  $\Delta C_T$  values reflect low amplification efficiency.

| Gene Symbol   | RefSeq*      | Magnitude of Expression<br>( $\Delta C_T$ ) | HOS+TUDCA<br>(fold change) |
|---------------|--------------|---------------------------------------------|----------------------------|
| <i>BCL6</i>   | NM_001706    | 4.30                                        | 1.30                       |
| <i>C3</i>     | NM_000064    | 7.61                                        | 1.30                       |
| <i>C3AR1</i>  | NM_004054    | 13.87                                       | 4.57                       |
| <i>CCL2</i>   | NM_002982    | 10.45                                       | 0.50                       |
| <i>CCL3</i>   | NM_002983    | 16.22                                       | 3.73                       |
| <i>CCL4</i>   | NM_002984    | 11.77                                       | 0.90                       |
| <i>CCL5</i>   | NM_002985    | 10.94                                       | 2.45                       |
| <i>CCL7</i>   | NM_006273    | 16.21                                       | 2.02                       |
| <i>CCL8</i>   | NM_005623    | 14.64                                       | 1.24                       |
| <i>CCL11</i>  | NM_002986    | 14.23                                       | 0.94                       |
| <i>CCL13</i>  | NM_005408    | 14.87                                       | 1.45                       |
| <i>CCL16</i>  | NM_004590    | 14.90                                       | 1.52                       |
| <i>CCL17</i>  | NM_002987    | 10.75                                       | 1.51                       |
| <i>CCL19</i>  | NM_006274    | 14.70                                       | 1.21                       |
| <i>CCL21</i>  | NM_002989    | 14.70                                       | 1.18                       |
| <i>CCL22</i>  | NM_002990    | 12.14                                       | 2.45                       |
| <i>CCL23</i>  | NM_005064    | 14.18                                       | 0.90                       |
| <i>CCL24</i>  | NM_002991    | 11.88                                       | 0.78                       |
| <i>CCR1</i>   | NM_001295    | 13.93                                       | 1.51                       |
| <i>CCR2</i>   | NM_001123396 | 11.11                                       | 0.27                       |
| <i>CCR3</i>   | NM_001837    | 11.09                                       | 0.37                       |
| <i>CCR4</i>   | NM_005508    | 14.64                                       | 1.10                       |
| <i>CCR7</i>   | NM_001838    | 15.43                                       | 1.93                       |
| <i>CD14</i>   | NM_000591    | 9.54                                        | 11.06                      |
| <i>CD40</i>   | NM_001250    | 14.66                                       | 1.24                       |
| <i>CD40LG</i> | NM_000074    | 14.64                                       | 1.11                       |
| <i>CEBPB</i>  | NM_005194    | 6.06                                        | 1.87                       |
| <i>CRP</i>    | NM_000567    | 14.63                                       | 1.23                       |

|                     |                  |             |             |
|---------------------|------------------|-------------|-------------|
| <i>CSF1</i>         | NM_000757        | 8.69        | 1.71        |
| <i>CXCL1</i>        | NM_001511        | 5.40        | 0.68        |
| <i>CXCL2</i>        | NM_002089        | 3.73        | 0.74        |
| <i>CXCL3</i>        | NM_002090        | 13.06       | 0.50        |
| <i>CXCL5</i>        | NM_002994        | 13.72       | 0.58        |
| <i>CXCL6</i>        | NM_002993        | 9.60        | 0.53        |
| <b><i>CXCL8</i></b> | <b>NM_000584</b> | <b>1.51</b> | <b>0.31</b> |
| <i>CXCL9</i>        | NM_002416        | 11.14       | 3.04        |
| <i>CXCL10</i>       | NM_001565        | 7.18        | 1.75        |
| <i>CXCR1</i>        | NM_000634        | 14.52       | 3.75        |
| <i>CXCR2</i>        | NM_001557        | 14.52       | 2.47        |
| <i>CXCR4</i>        | NM_003467        | 11.91       | 0.24        |
| <i>FASLG</i>        | NM_000639        | 13.57       | 0.59        |
| <i>FOS</i>          | NM_005252        | 7.30        | 0.22        |
| <i>IFNG</i>         | NM_000619        | 11.38       | 0.14        |
| <i>IL1A</i>         | NM_000575        | 2.40        | 0.95        |
| <i>IL1B</i>         | NM_000576        | 2.33        | 0.71        |
| <i>IL1R1</i>        | NM_000877        | 10.51       | 1.75        |
| <i>IL1RAP</i>       | NM_002182        | 6.45        | 0.95        |
| <i>IL1RN</i>        | NM_000577        | 1.22        | 1.15        |
| <b><i>IL5</i></b>   | <b>NM_000879</b> | <b>9.44</b> | <b>0.10</b> |
| <i>IL6</i>          | NM_000600        | 5.72        | 0.25        |
| <i>IL6R</i>         | NM_000565        | 11.78       | 1.17        |
| <i>IL9</i>          | NM_000590        | 11.88       | 0.27        |
| <i>IL10</i>         | NM_000572        | 12.05       | 0.17        |
| <i>IL10RB</i>       | NM_000628        | 7.20        | 3.29        |
| <i>IL15</i>         | NM_000585        | 5.80        | 2.92        |
| <i>IL17A</i>        | NM_002190        | 14.64       | 1.31        |
| <i>IL18</i>         | NM_001562        | 0.30        | 0.85        |
| <i>IL22</i>         | NM_020525        | 12.86       | 0.26        |
| <i>IL23A</i>        | NM_016584        | 11.16       | 2.25        |
| <i>IL23R</i>        | NM_144701        | 16.26       | 2.77        |
| <i>ITGB2</i>        | NM_000211        | 11.47       | 1.39        |
| <i>KNG1</i>         | NM_000893        | 13.71       | 0.71        |

|                |              |       |      |
|----------------|--------------|-------|------|
| <i>LTA</i>     | NM_000595    | 14.97 | 1.31 |
| <i>LTB</i>     | NM_002341    | 7.86  | 0.86 |
| <i>LY96</i>    | NM_015364    | 8.37  | 3.82 |
| <i>MYD88</i>   | NM_002468    | 3.38  | 1.74 |
| <i>NFKB1</i>   | NM_003998    | 7.10  | 1.46 |
| <i>NOS2</i>    | NM_000625    | 9.37  | 0.98 |
| <i>NR3C1</i>   | NM_000176    | 3.66  | 2.00 |
| <i>PTGS2</i>   | NM_000963    | 2.89  | 0.21 |
| <i>RIPK2</i>   | NM_003821    | 3.39  | 1.09 |
| <i>SELE</i>    | NM_000450    | 11.39 | 0.35 |
| <i>TIRAP</i>   | NM_001039661 | 11.40 | 2.06 |
| <i>TLR1</i>    | NM_003263    | 11.58 | 1.53 |
| <i>TLR2</i>    | NM_003264    | 10.23 | 2.70 |
| <i>TLR3</i>    | NM_003265    | 8.53  | 1.10 |
| <i>TLR4</i>    | NM_138554    | 13.15 | 1.83 |
| <i>TLR5</i>    | NM_003268    | 8.48  | 1.81 |
| <i>TLR6</i>    | NM_006068    | 7.59  | 1.16 |
| <i>TLR7</i>    | NM_016562    | 13.52 | 0.49 |
| <i>TLR9</i>    | NM_017442    | 14.51 | 1.25 |
| <i>TNF</i>     | NM_000594    | 7.32  | 0.62 |
| <i>TNFSF14</i> | NM_003807    | 13.15 | 3.59 |
| <i>TOLLIP</i>  | NM_019009    | 8.25  | 2.00 |

---

\*Reference sequence database at NCBI (<https://www.ncbi.nlm.nih.gov/refseq/>).
